# Supplementary material for: Solar driven efficient direct conversion of methane to multicarbon oxygenates
Source: Royal Society of Chemistry journal article supplement (doi:10.1039/d1ta10846h), 2022-01-01
Supplement: d1ta10846h1.pdf [file d1ta10846h1.pdf]

## Supplementary Information for

### Solar driven efficient conversion of methane to multicarbon

### oxygenates†

Guanghai Feng,<sup>‡ab</sup> Yonghui Zhao,<sup>‡a</sup> Cuijie Ma,<sup>‡ac</sup> Wei Chen,<sup>\*a</sup> Tong Li,<sup>ab</sup> Xiaoju Zhao,<sup>ab</sup> Guihua Li,<sup>ab</sup> Xiao Dong,<sup>a</sup> Yanfang Song,<sup>a</sup> Wei Wei,<sup>\*ac</sup> Yuhao Sun,<sup>\*ac</sup>

<sup>a</sup> CAS Key Laboratory of Low-Carbon Conversion Science and Engineering, Shanghai Advanced Research Institute, Chinese Academy of Sciences, Shanghai 201210, P.R. China

<sup>b</sup> University of Chinese Academy of Sciences, Beijing 100049, P.R. China

<sup>c</sup> School of Physical Science and Technology, ShanghaiTech University, Shanghai 201210, P.R. China

<sup>‡</sup> These authors have contributed equally.

\* E-mail: chenw@sari.ac.cn, weiwei@sari.ac.cn, sunyh@sari.ac.cn

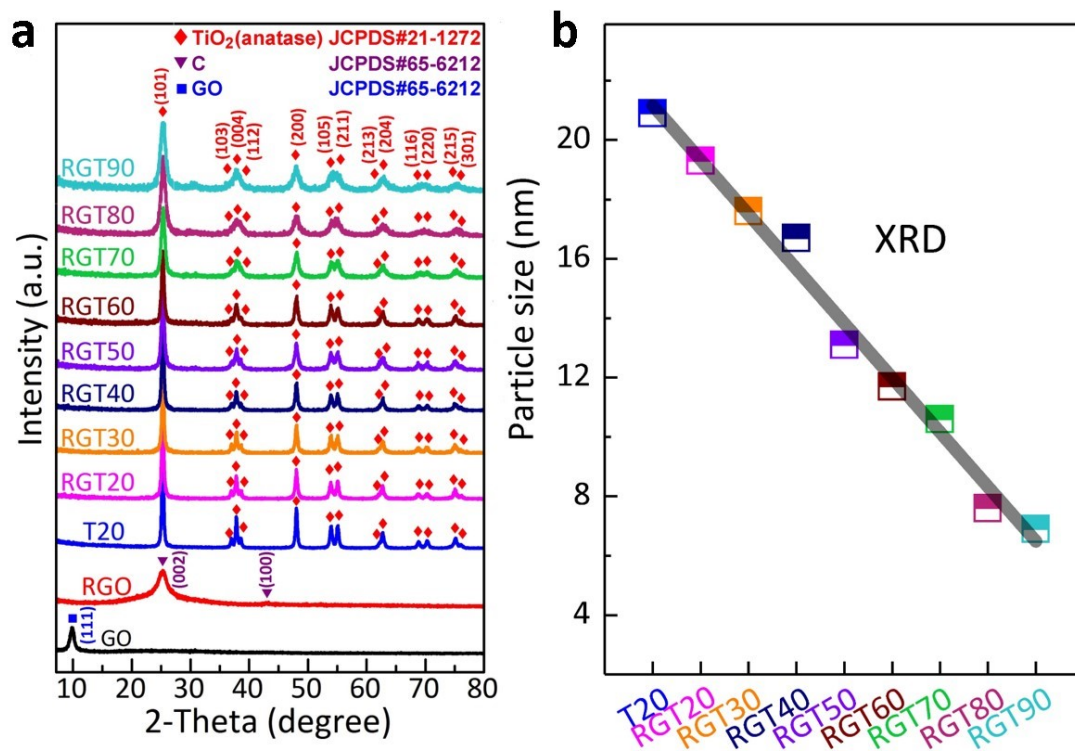

**Fig. S1.** (a) XRD patterns of GO, RGO, T20 and RGTX in the range of 5°-80°, X=20, 30, 40, 50, 60, 70, 80 and 90, as in Fig. 1b in the main text; (b) Comparison of particle size based on a calculation using the Scherrer equation on account of the TiO<sub>2</sub>(200) peak.

The particle size of TiO<sub>2</sub> in the T20 and RGTX samples calculated by using the Scherrer equation differs from that obtained from the TEM size distribution, but the trend of the particle size change is consistent, i.e., the temperature of ultrapure water during hydrolysis of titanium precursors has a large effect on the particle size, and as the temperature of the ultrapure water increases, the water vapor concentration increases and the hydrolysis rate increases, leading to a decrease in the particle size of TiO<sub>2</sub>.

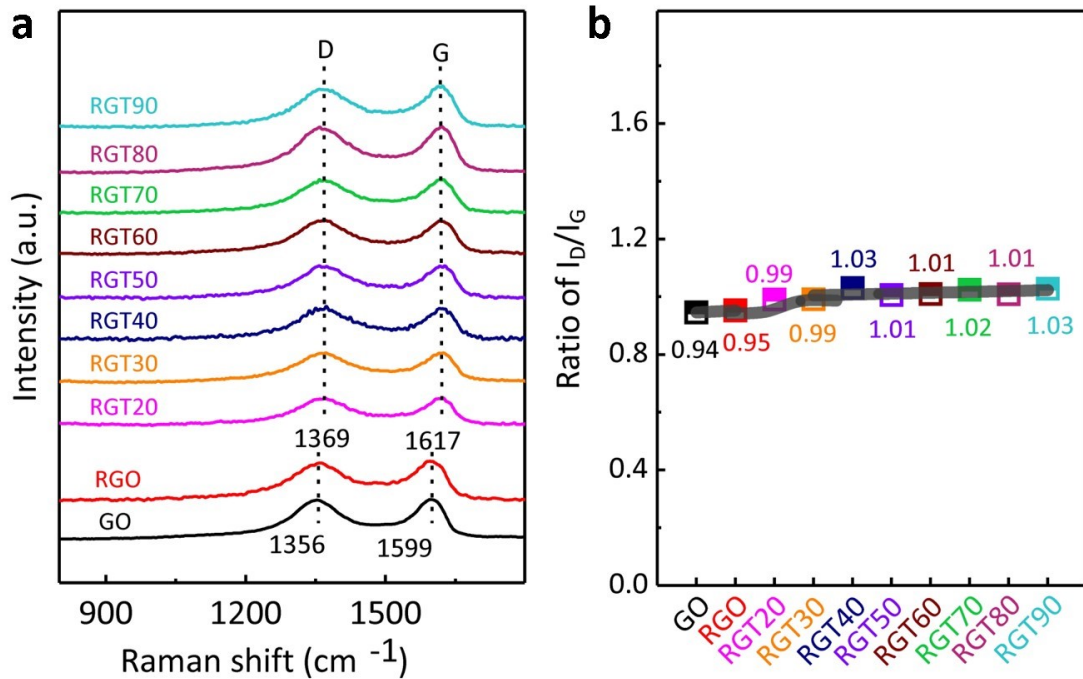

**Fig. S2.** (a) D bands and G bands in the Raman spectra of the GO, RGO, T20 and RGTX samples; (b) Comparison of the intensity ratio of the D band to the G band ( $I_D/I_G$ ) over the GO, RGO, T20 and RGTX samples.

Figure S2† shows the peak shift and intensity ratio ( $I_D/I_G$ ) of the D band and the G band in the Raman spectra of GO, RGO and RGO in the T20 and RGTX samples, indicating that GO is partially reduced to RGO and interacts with TiO<sub>2</sub> particles in the RGTX samples.

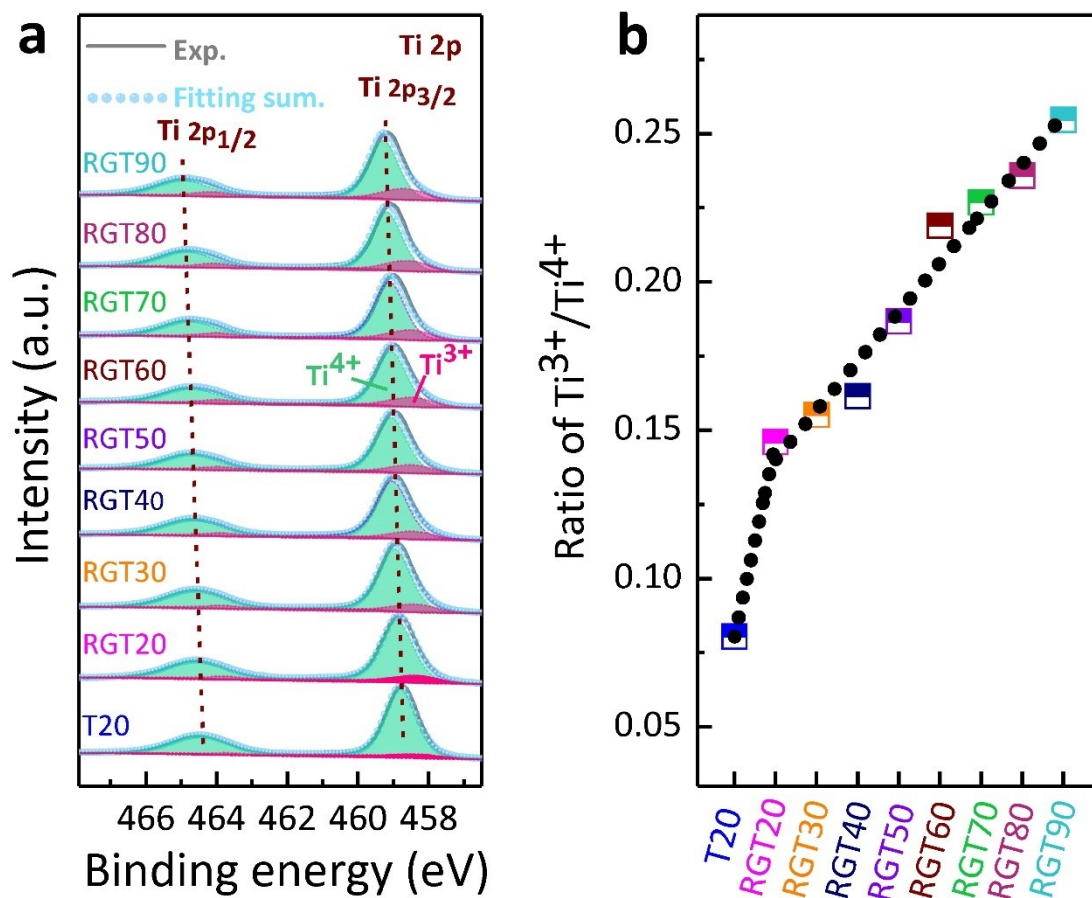

Fig. S3. (a) High-resolution Ti2p XPS spectra of the T20 and RGTX samples; (b) The  $Ti^{3+}/Ti^{4+}$  ratio over the T20 and RGTX samples.

The Ti 2p XPS spectra of the T20 and RGTX samples could be fitted with four distinct peaks:  $Ti^{4+}$  2p 3/2,  $Ti^{4+}$  2p 1/2,  $Ti^{3+}$  2p 3/2, and  $Ti^{3+}$  2p 1/2. The  $Ti^{3+}/Ti^{4+}$  ratio increased with increasing ultrapure water temperature. Moreover, the concentration of O-vacancies and  $Ti^{3+}$  defects determined from the EPR spectrum (Fig. 1e) and the fitted data for the  $Ti^{3+}/Ti^{4+}$  ratio further indicated that O-vacancies and  $Ti^{3+}$  defects can be quantitative. Compared to pristine  $TiO_2$ , RGTX presents Ti 2p3/2 and Ti 2p1/2 peaks that are positively shifted to different degrees, which could be ascribed to the high dispersion of small  $TiO_2$  particles and the reduced electron cloud density of Ti caused by the interaction between RGO and  $TiO_2$ . The presence of  $Ti^{3+}$  species indicates that  $Ti^{4+}$  ions obtain electrons from nearby O-vacancies, which indirectly proves the existence of O-vacancies in  $TiO_2$  (Fig. 1e).

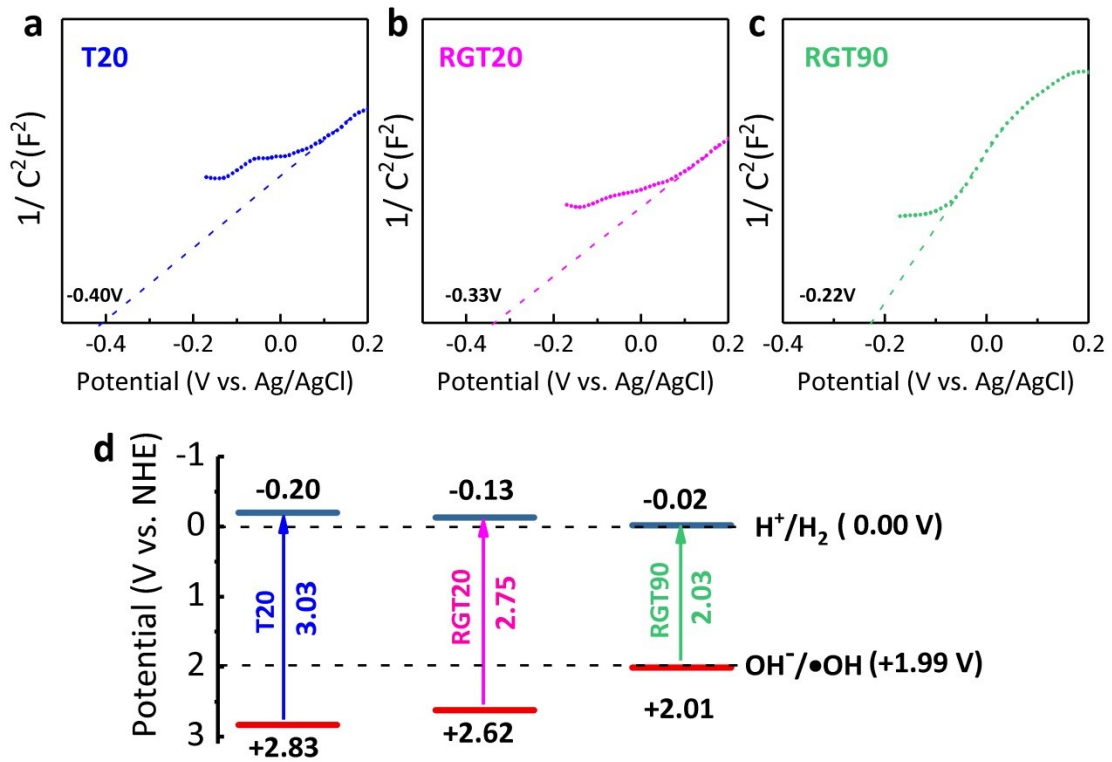

**Fig. S4.** Mott-Schottky plots of (a) T20, (b) RGT20 and (c) RGT90 and (d) their corresponding energy band structure alignments.

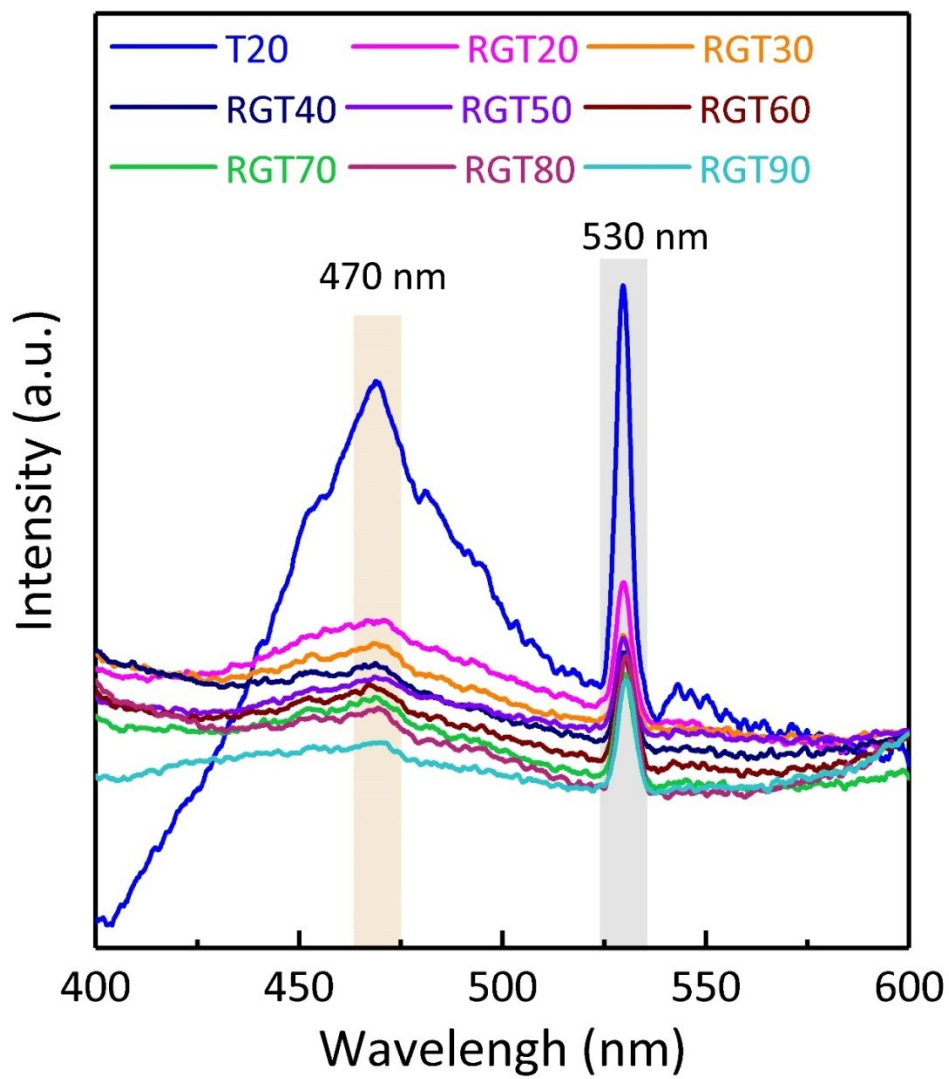

Fig. S5. PL spectra of the T20 and RGT catalysts.

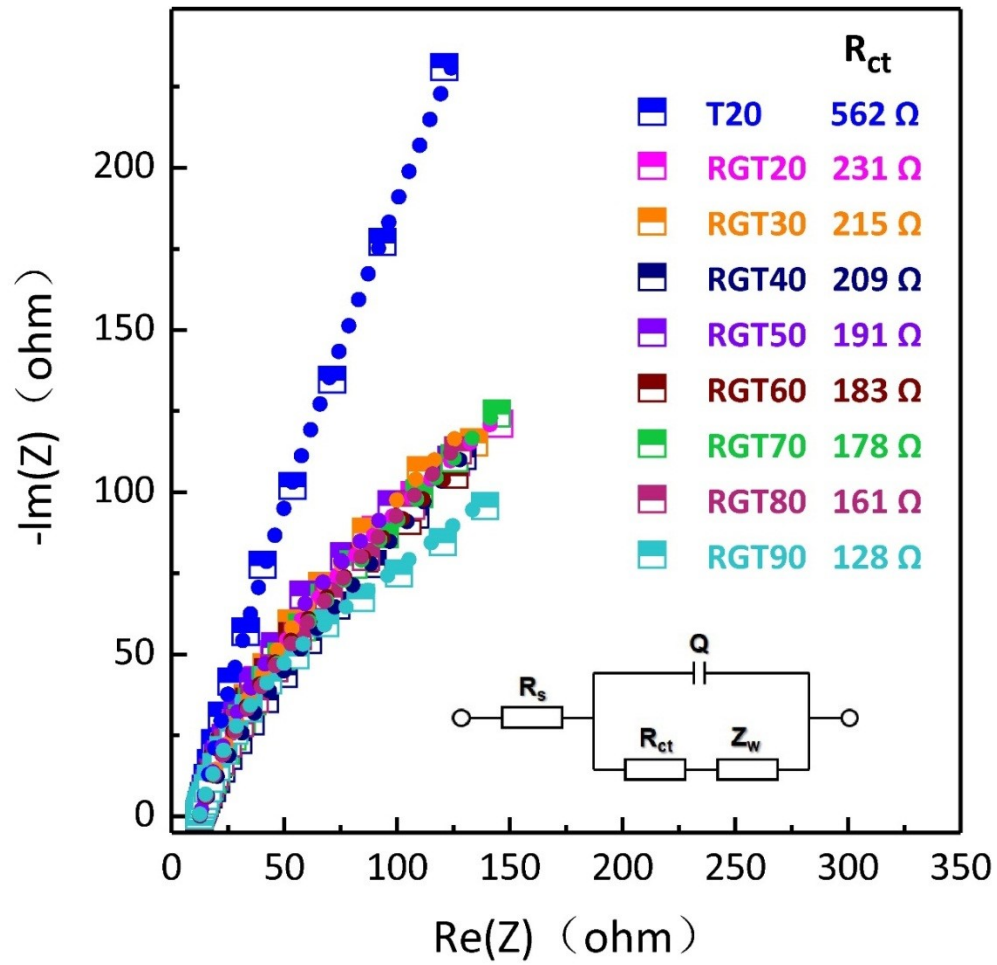

**Fig. S6.** EIS Nyquist plots of the T20 and RGT catalysts. The dotted lines indicate the fits to the experimental data (pentagram dots) using the equivalent circuit in the inset. Inset: Equivalent circuit model. ( $R_s$  refers to the series resistance, and  $R_{ct}$  and  $Z_w$  are the charge transfer resistance and the constant phase element, respectively.)

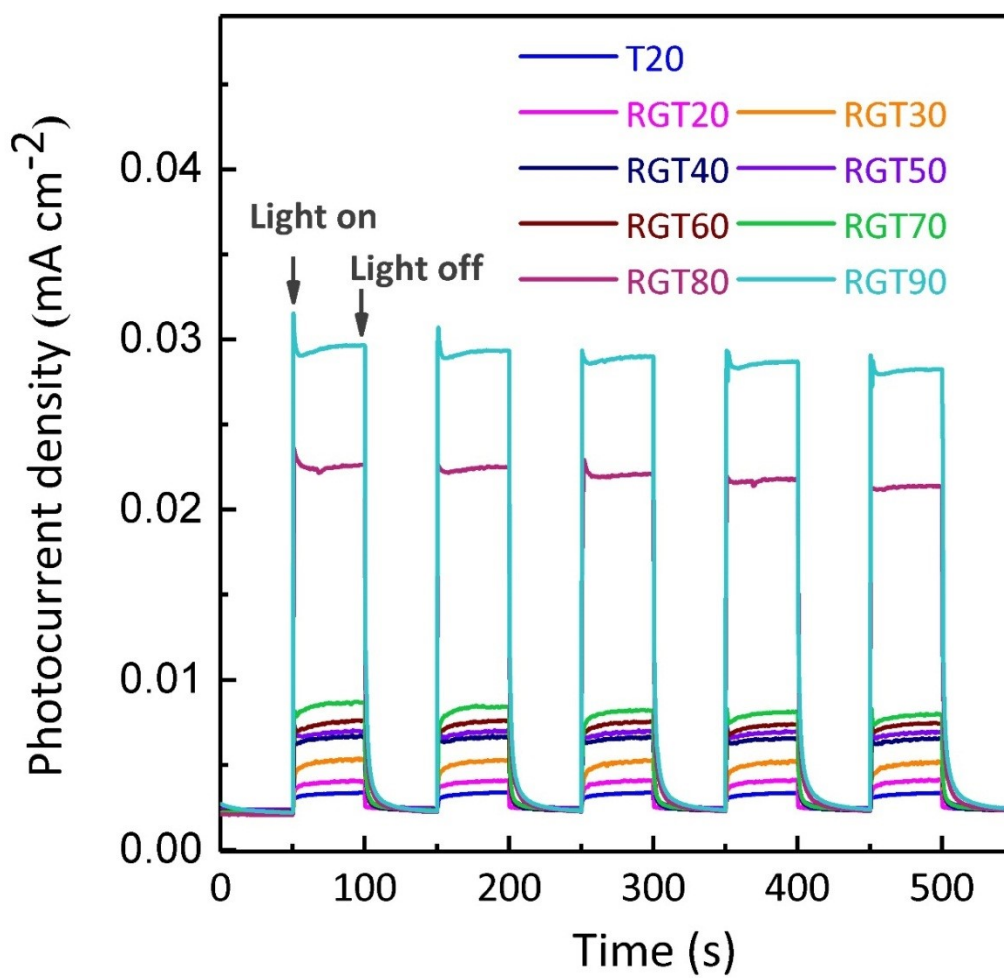

**Fig. S7.** Transient photocurrent curves of the T20 and RGTX catalysts under simulated solar light Xe lamp irradiation with an air mass (AM) 1.5 filter with a 0 mV bias (vs. Ag/AgCl). The arrows show the times of light on and light off.



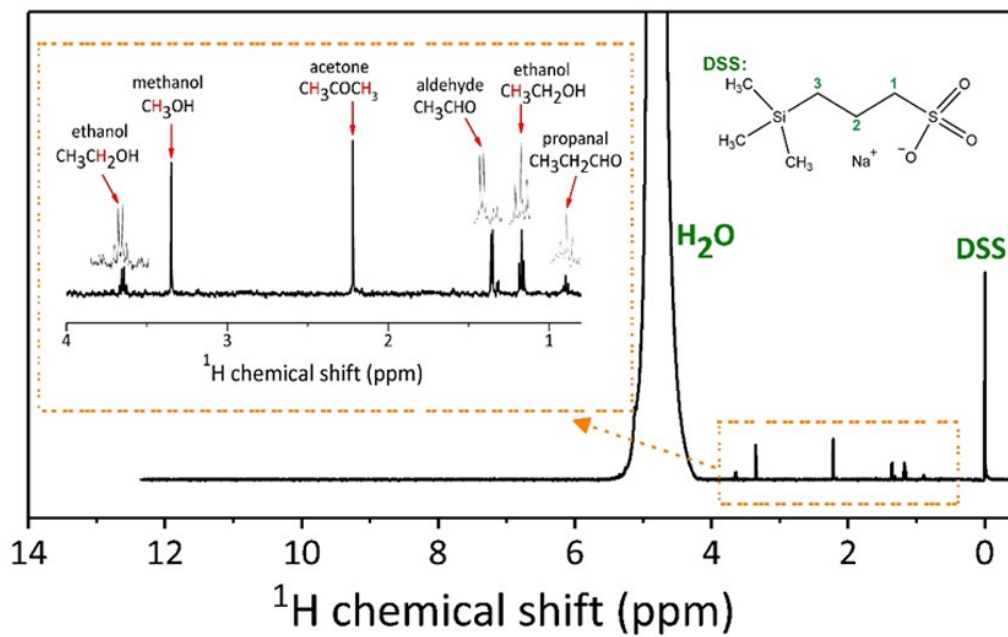

**Fig. S8.**  $^1\text{H}$  NMR spectrum of the reaction products from POM with water vapor by the RGT90 catalyst. Reaction conditions: 2 mg of catalyst, the tail gas of the reaction was collected in an ice bath of 2 mL of deionized water, and the reaction was carried out at 60 °C for 5 h at atmospheric pressure  $\text{CH}_4$ .

By prolonging the reaction time to 5 h and collecting the reaction gas in ultrapure water in an ice-water bath, peaks attributed to methanol, aldehyde, ethanol, propanal and acetone appeared in the HNMR spectrum, further providing clear evidence of the generation of multicarbon oxygenates (**Fig. 2a and b**).

| No.    | Time min | Peak Name | Peak Type | Area $\mu\text{S}\cdot\text{min}$ | Height $\mu\text{S}$ | Amount |
|--------|----------|-----------|-----------|-----------------------------------|----------------------|--------|
| 1      | 4.01     | Ac        | BM*       | 0.016                             | 0.077                | n.a.   |
| 2      | 4.45     | HCOO      | MB*       | 0.008                             | 0.042                | n.a.   |
| TOTAL: |          |           |           | 0.02                              | 0.12                 | 0.00   |

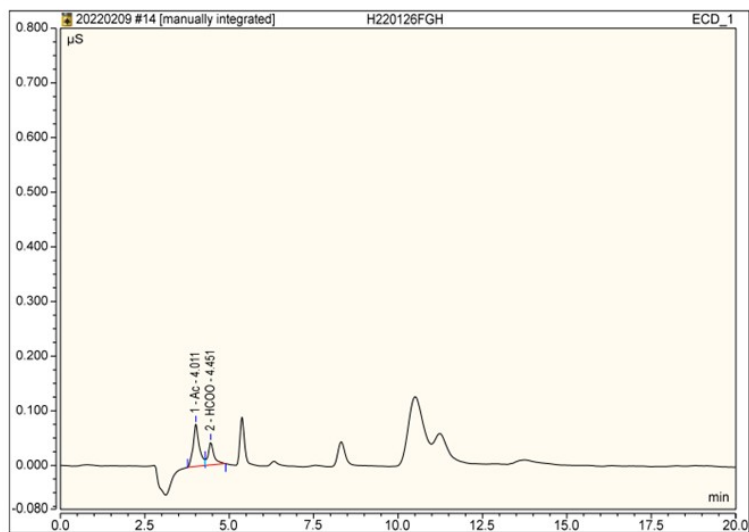

**Fig. S9.** Ion chromatography curve of the reaction products from POM with water vapor by the RGT90 catalyst.

Reaction conditions: 2 mg of catalyst, the tail gas of the reaction was collected in an ice bath of 5 mL of deionized water, and the reaction was carried out at 60 °C for 5 h at atmospheric pressure  $\text{CH}_4$ .

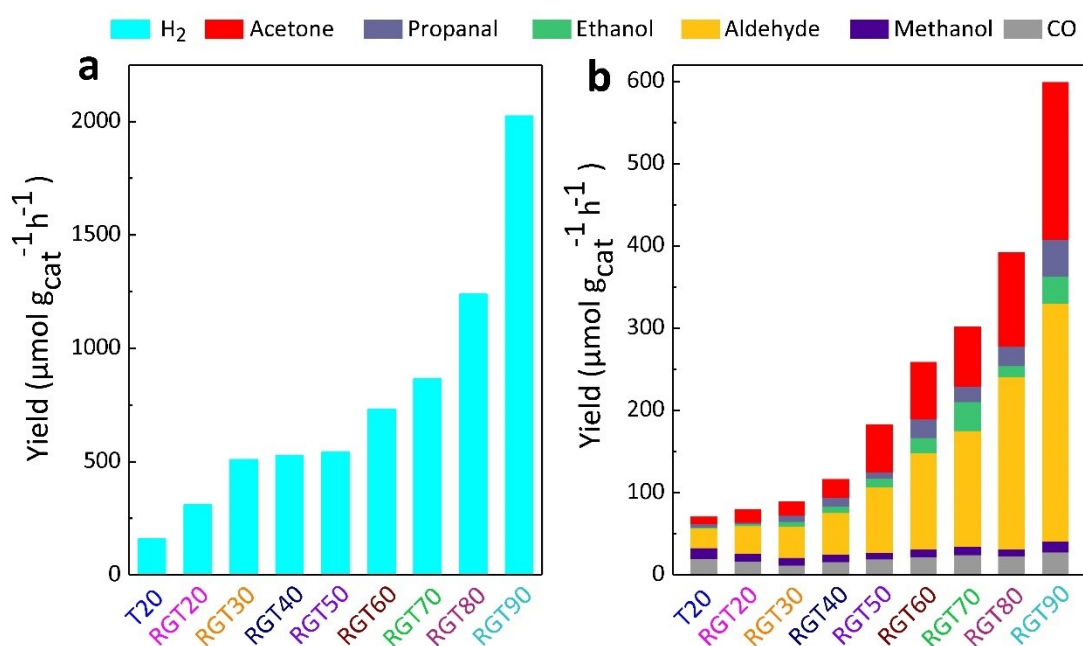

**Fig. S10.** (a) Yield of  $H_2$  over T20 and RGTX for POM with  $H_2O$  under simulated sunlight irradiation; (b) Yield over T20 and RGTX for POM with  $H_2O$  under simulated sunlight irradiation. Fig. S8b is the same as Fig. 2b in the main text.

In consideration of charge balance throughout the whole system, we calculated the theoretical yield of the reduced product ( $H_2$ ) by the total electron gain/loss transfer of the oxidized product ( $CO$ ,  $CH_3OH$ ,  $CH_3CHO$ ,  $CH_3CH_2OH$ ,  $CH_3CH_2CHO$  and  $CH_3COCH_3$ ).

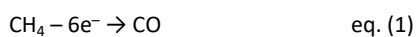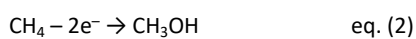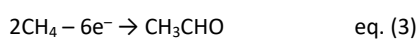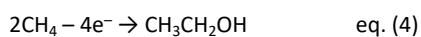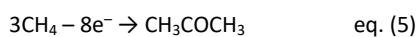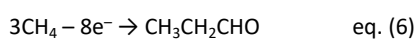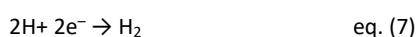

As displayed in eqs. (1)-(6) above, for the purpose of calculation, we assumed that the yields of  $CO$ ,  $CH_3OH$ ,  $CH_3CHO$ ,  $CH_3CH_2OH$ ,  $CH_3CH_2CHO$  and  $CH_3COCH_3$  were  $a$ ,  $b$ ,  $c$ ,  $d$ ,  $e$  and  $f$ , respectively, and the total number of electrons lost in the oxidation products was  $6a + 2b + 6c + 4d + 8e + 8f$ . According to eq. (7), assuming that the theoretical yield of  $H_2$  is  $g$ , the total number of electrons gained is  $2g$ . The conservation of electrons gained and

lost,  $6a + 2b + 6c + 4d + 8e + 8f = 2g$ , was used to calculate the theoretical hydrogen yields of T20, RGT20, RGT30, RGT40, RGT50, RGT60, RGT70, RGT80 and RGT90 for photocatalytic methane with water:  $158.6 \mu\text{mol}\cdot\text{g}_{\text{cat}}^{-1}\cdot\text{h}^{-1}$ ,  $308.6 \mu\text{mol}\cdot\text{g}_{\text{cat}}^{-1}\cdot\text{h}^{-1}$ ,  $509.4 \mu\text{mol}\cdot\text{g}_{\text{cat}}^{-1}\cdot\text{h}^{-1}$ ,  $526.7 \mu\text{mol}\cdot\text{g}_{\text{cat}}^{-1}\cdot\text{h}^{-1}$ ,  $543.8 \mu\text{mol}\cdot\text{g}_{\text{cat}}^{-1}\cdot\text{h}^{-1}$ ,  $730.6 \mu\text{mol}\cdot\text{g}_{\text{cat}}^{-1}\cdot\text{h}^{-1}$ ,  $866.3 \mu\text{mol}\cdot\text{g}_{\text{cat}}^{-1}\cdot\text{h}^{-1}$ ,  $1237.8 \mu\text{mol}\cdot\text{g}_{\text{cat}}^{-1}\cdot\text{h}^{-1}$  and  $2025.8 \mu\text{mol}\cdot\text{g}_{\text{cat}}^{-1}\cdot\text{h}^{-1}$ , respectively. This is not much different from the actual measured hydrogen production (**Fig. S10a†**), so we think that the occurrence of redox reactions in pairs in POM process.

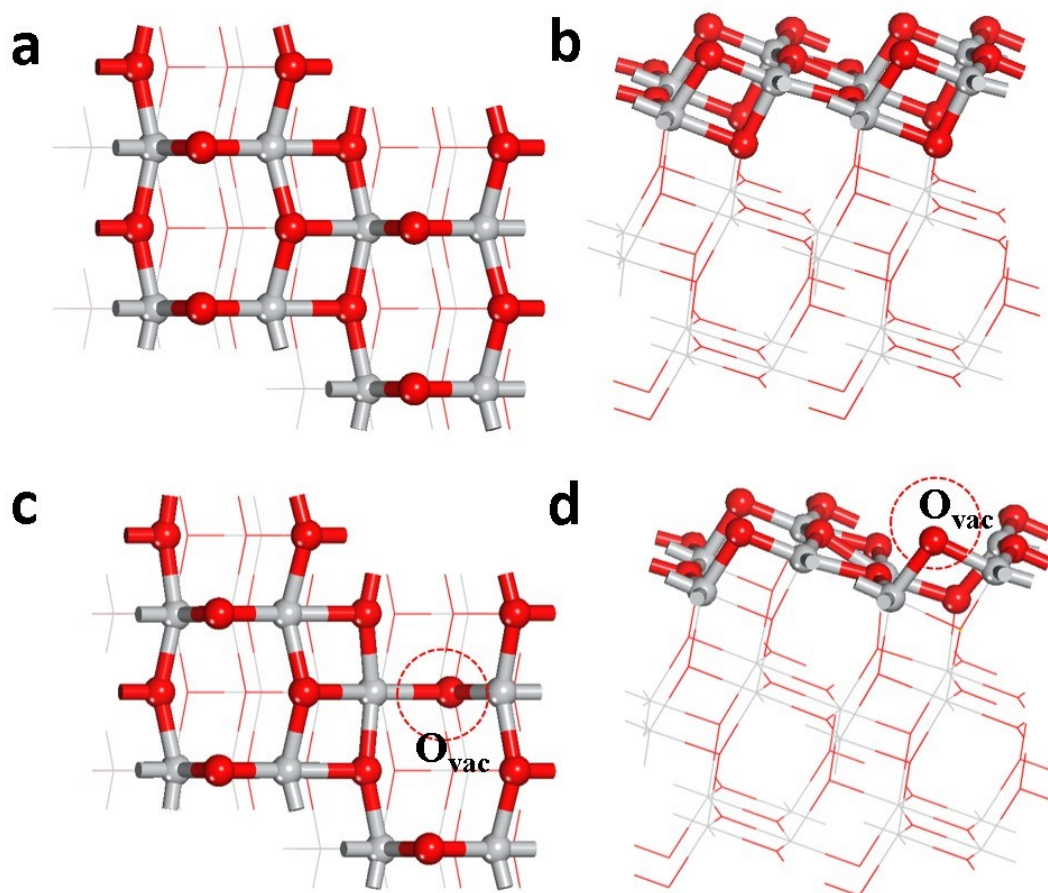

**Fig. S11.** Top and side views of the  $2 \times 2$  supercell structure of the  $\text{TiO}_2(101)$  surface (a, b) and O-vacancy/ $\text{TiO}_2(101)$  surface (c, d).  $\text{O}_{\text{vac}}$  denotes the twofold-coordinate O atom vacancy. (Dark gray: Ti; light gray: C; red: O; white: H). Figs. S9c and d are the same as Fig. 3b and a in the main text, respectively.

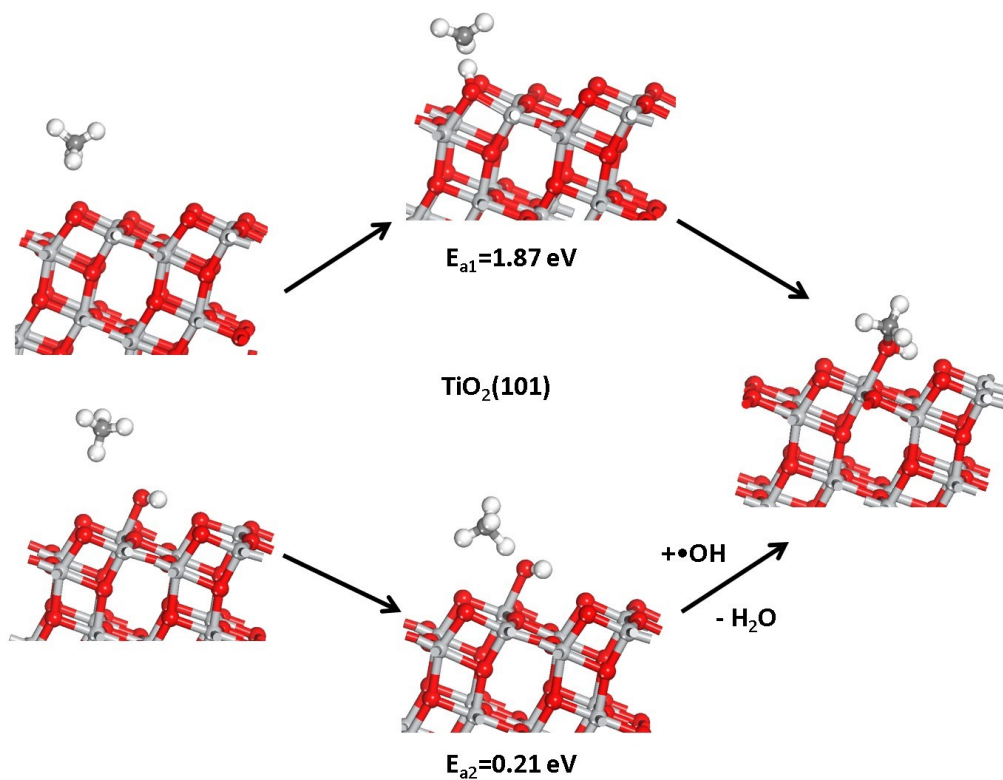

**Fig. S12.** Two possible pathways for CH<sub>4</sub> dissociation on the TiO<sub>2</sub>(101) surface: direct dissociation mechanism (above) and  $\bullet\text{OH}$ -assisted dissociation mechanism (below). (Dark gray: C; light gray: C; red: O; white: H).

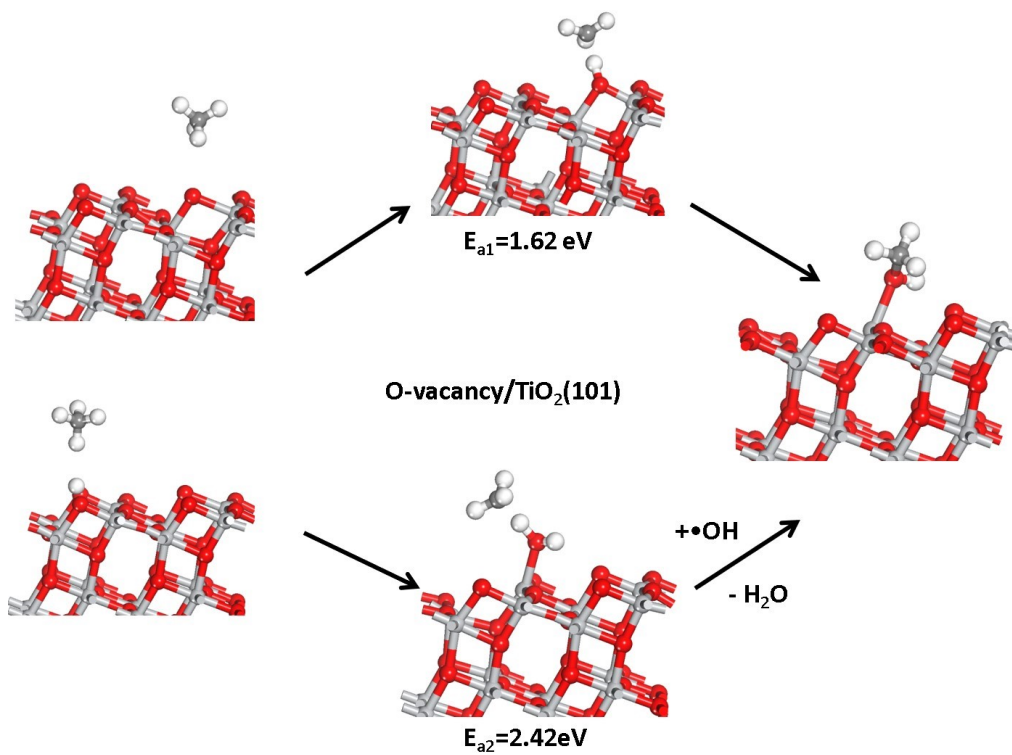

**Fig. S13.** Two possible pathways for CH<sub>4</sub> dissociation on the O-vacancy/TiO<sub>2</sub>(101) surface: direct dissociation mechanism (above) and •OH-assisted dissociation mechanism (below). (Dark gray: C; light gray: C; red: O; white: H).

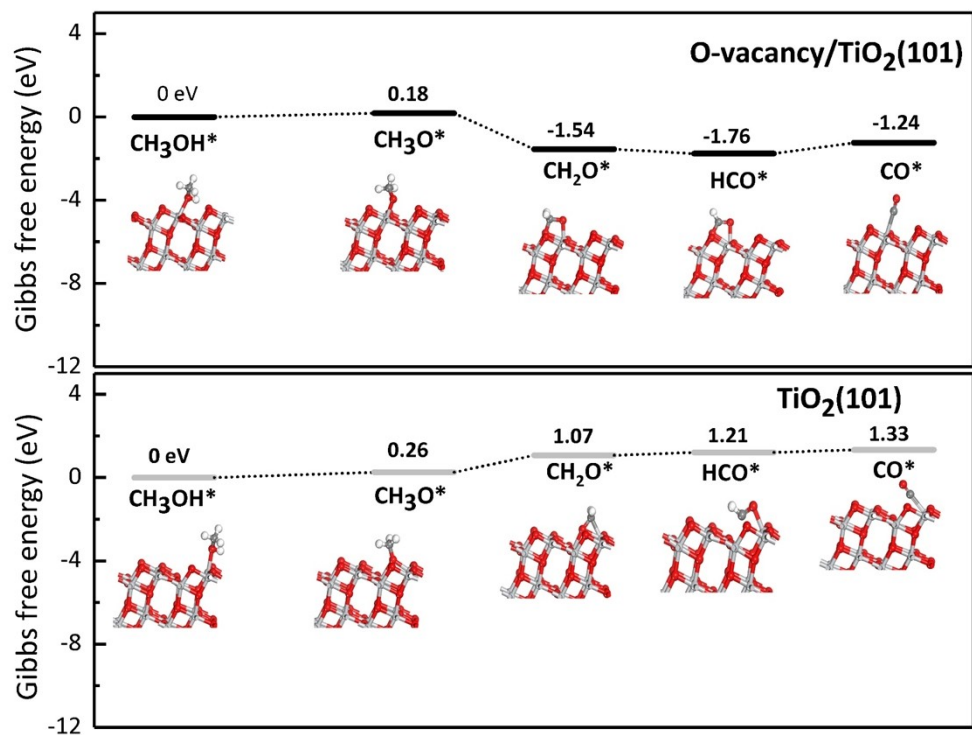

**Fig. S14.** Free energy diagrams calculated for the pathways of photooxidation of  $\text{CH}_3\text{OH}$  by  $\cdot\text{OH}$  radicals on  $\text{TiO}_2(101)$  surfaces (top) and O-vacancy/ $\text{TiO}_2(101)$  surfaces (bottom). Inset: Optimized structures of reaction intermediates in the pathways (Dark gray: C; light gray: C; red: O; white: H).



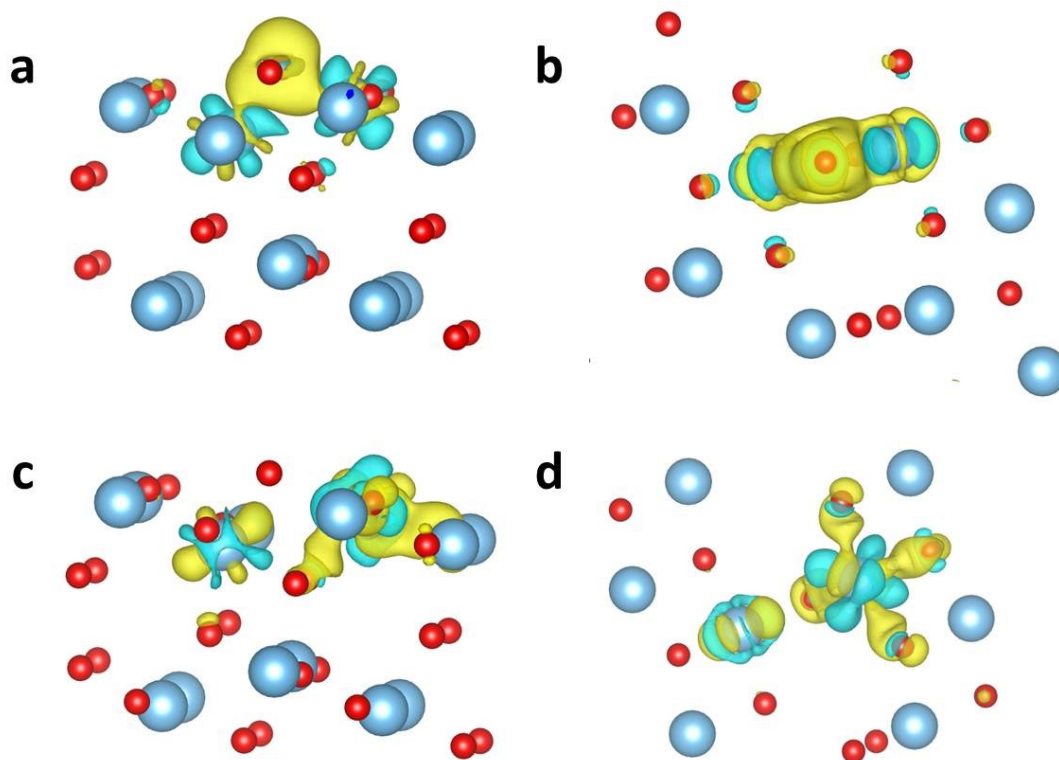

**Fig. S15.** Side and top views of the difference between charge densities of the perfect TiO<sub>2</sub>(101) surfaces (a, b) and O-vacancy/TiO<sub>2</sub>(101) surfaces (c, d); the isosurface value is 0.01 e/Å<sup>3</sup>. The blue and yellow lobes represent the negative and positive levels of isosurfaces, respectively.

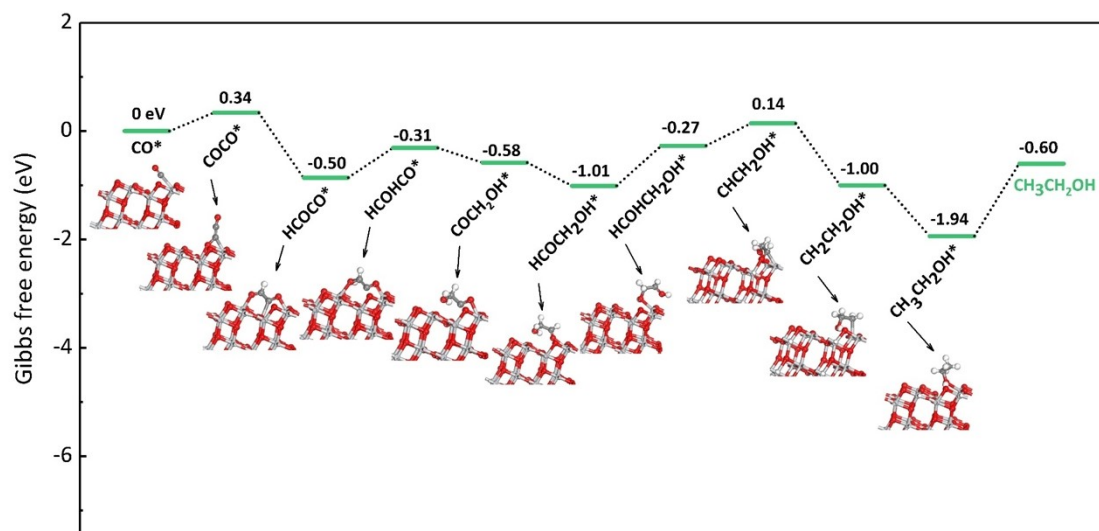

**Fig. S16.** Free energy diagrams calculated for the pathways CO reduction to CH<sub>3</sub>CH<sub>2</sub>OH on O-vacancy/TiO<sub>2</sub>(101) surfaces. Inset: Optimized structures of the reaction intermediates in the pathways (Dark gray: C; light gray: O; red: H; white: H).

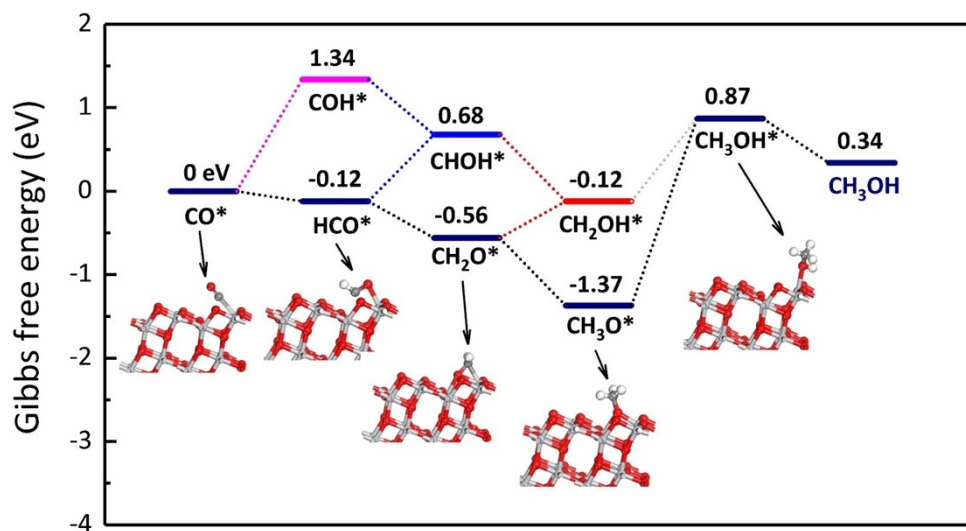

**Fig. S17.** Free energy diagrams calculated for the pathways of CO reduction to CH<sub>3</sub>OH on O-vacancy/TiO<sub>2</sub>(101) surfaces (Dark gray: C; light gray: C; red: O; white: H).

**Table S1.** Zero-point energy (ZPE) and entropy corrections (TS) at T = 298 K for gaseous molecules.

| <b>Adsorbate</b>                   | <b>ZPE (eV)</b> | <b>TS (eV)</b> |
|------------------------------------|-----------------|----------------|
| H <sub>2</sub>                     | 0.28            | 0.40           |
| H <sub>2</sub> O                   | 0.57            | 0.58           |
| CO                                 | 0.14            | 0.61           |
| CH <sub>4</sub>                    | 1.19            | 0.58           |
| CH <sub>3</sub> OH                 | 1.36            | 0.74           |
| CH <sub>3</sub> CH <sub>2</sub> OH | 2.11            | 0.82           |
| CH <sub>3</sub> CHO                | 1.47            | 0.57           |
| CH <sub>3</sub> COCH <sub>3</sub>  | 2.21            | 0.68           |

**Table S2.** The adsorption energies <sup>a</sup>, Zero-point energy (ZPE, in eV) and entropy correction (TS, in eV) at T = 298 K.

All values are given in eV.

| Adsorbate                             | O-vacancy/TiO <sub>2</sub> (101) |          |         | TiO <sub>2</sub> (101) |          |         |
|---------------------------------------|----------------------------------|----------|---------|------------------------|----------|---------|
|                                       | Adsorption energy (eV)           | ZPE (eV) | TS (eV) | Adsorption energy (eV) | ZPE (eV) | TS (eV) |
| *CH <sub>3</sub> OH                   | -1.21                            | 1.44     | 0.22    | -0.66                  | 1.39     | 0.36    |
| *CH <sub>3</sub> O                    | -4.02                            | 1.11     | 0.14    | -2.06                  | 1.03     | 0.05    |
| *CH <sub>2</sub> O                    | -1.69                            | 0.79     | 0.13    | -1.32                  | 0.86     | 0.11    |
| *CHO                                  | -2.76                            | 0.47     | 0.14    | -2.81                  | 0.56     | 0.10    |
| *CO                                   | -0.86                            | 0.18     | 0.20    | -0.42                  | 0.18     | 0.21    |
| *H <sub>2</sub> O                     | -1.40                            | 0.66     | 0.09    | -1.03                  | 0.67     | 0.13    |
| *OH                                   | -4.72                            | 0.37     | 0.07    | -1.16                  | 0.32     | 0.14    |
| *COCO                                 | -2.37                            | 0.43     | 0.29    |                        |          |         |
| *COC                                  | -8.34                            | 0.35     | 0.19    |                        |          |         |
| *COCH                                 | -3.62                            | 0.62     | 0.24    |                        |          |         |
| *COCH <sub>2</sub>                    | -0.96                            | 0.91     | 0.17    |                        |          |         |
| *COCH <sub>3</sub>                    | -2.49                            | 1.22     | 0.25    |                        |          |         |
| *COCOCH <sub>3</sub>                  | -3.15                            | 1.47     | 0.34    |                        |          |         |
| *COHCOCH <sub>3</sub>                 | -4.30                            | 1.79     | 0.34    |                        |          |         |
| *CCOCH <sub>3</sub>                   | -4.29                            | 1.35     | 0.25    |                        |          |         |
| *CHCOCH <sub>3</sub>                  | -4.77                            | 1.65     | 0.26    |                        |          |         |
| *CH <sub>2</sub> COCH <sub>3</sub>    | -4.08                            | 1.97     | 0.24    |                        |          |         |
| *CH <sub>3</sub> COCH <sub>3</sub>    | -1.30                            | 2.26     | 0.44    |                        |          |         |
| *COCO                                 | -3.00                            | 0.74     | 0.27    |                        |          |         |
| *COCHO                                | -3.03                            | 0.74     | 0.18    |                        |          |         |
| *COCHOH                               | -3.53                            | 1.05     | 0.20    |                        |          |         |
| *COCH <sub>2</sub> OH                 | -3.08                            | 1.37     | 0.22    |                        |          |         |
| *COHCH <sub>2</sub> OH                | -3.38                            | 1.68     | 0.23    |                        |          |         |
| *HCOCH <sub>2</sub> OH                | -2.14                            | 1.68     | 0.26    |                        |          |         |
| *CHOHCH <sub>2</sub> OH               | -2.67                            | 1.95     | 0.27    |                        |          |         |
| *CH <sub>2</sub> OHCH <sub>2</sub> OH | -2.86                            | 2.34     | 0.26    |                        |          |         |
| *CHCH <sub>2</sub> OH                 | -4.09                            | 1.59     | 0.17    |                        |          |         |
| *CH <sub>2</sub> CH <sub>2</sub> OH   | -3.05                            | 1.86     | 0.20    |                        |          |         |
| *CH <sub>3</sub> CH <sub>2</sub> OH   | -1.34                            | 2.19     | 0.26    |                        |          |         |
| *CH <sub>3</sub> CHOH                 | -1.93                            | 1.78     | 0.31    |                        |          |         |
| *CH <sub>3</sub> CHO                  | -1.22                            | 1.51     | 0.35    |                        |          |         |
| *CH <sub>2</sub> OH                   | -2.47                            | 1.18     | 0.13    |                        |          |         |
| *CHOH                                 | -2.73                            | 0.78     | 0.16    |                        |          |         |
| *COH                                  | -2.94                            | 0.48     | 0.04    |                        |          |         |

<sup>a</sup> The adsorption energy is defined as  $E_{ad} = E_{slab+A} - E_{slab} - E_A$ , where the  $E_{slab+A}$  is the total energy of the slab with adsorbate,  $E_{slab}$  is the energy of surface, and  $E_A$  is the energy of gas-phase adsorbate A.

**Table S3.** Control experimental results of POM over the blank RGO and RGT90 catalysts.

| entry | Reactant               | oxidant             | Catalyst | Temperature (°C) | Light Source | Product                       |
|-------|------------------------|---------------------|----------|------------------|--------------|-------------------------------|
| 1     | 10%CH <sub>4</sub> /Ar | H <sub>2</sub> O(g) | RGO      | 60               | ℞            | None                          |
| 2     | Ar                     | H <sub>2</sub> O(g) | RGT90    | 60               | ℞            | H <sub>2</sub>                |
| 3     | 10%CH <sub>4</sub> /Ar | None                | RGT90    | 60               | ℞            | None                          |
| 4     | 10%CH <sub>4</sub> /Ar | H <sub>2</sub> O(g) | None     | 60               | ℞            | None                          |
| 5     | 10%CH <sub>4</sub> /Ar | H <sub>2</sub> O(g) | RGT90    | 60               | None         | None                          |
| 6     | 10%CH <sub>4</sub> /Ar | H <sub>2</sub> O(g) | RGT90    | 60               | ℞            | H <sub>2</sub> and oxygenates |

**Table S4.** Yield comparison of all products (including trace C<sub>2</sub>H<sub>6</sub> and C<sub>2</sub>H<sub>4</sub>) over T20 and RGTX for POM with H<sub>2</sub>O under simulated sunlight irradiation.

| Catalyst | Yield<br>( $\mu\text{mol}\cdot\text{g}_{\text{cat}}^{-1}\cdot\text{h}^{-1}$ ) |                               |       |          |          |         |          |         |
|----------|-------------------------------------------------------------------------------|-------------------------------|-------|----------|----------|---------|----------|---------|
|          | C <sub>2</sub> H <sub>6</sub>                                                 | C <sub>2</sub> H <sub>4</sub> | CO    | Methanol | Aldehyde | Ethanol | Propanal | Acetone |
| T20      | 0.19                                                                          | 0.18                          | 19.75 | 12.86    | 24.00    | 1.64    | 3.71     | 9.07    |
| RGT20    | 0.25                                                                          | 0.23                          | 16.19 | 10.02    | 33.11    | 2.46    | 2.04     | 15.91   |
| RGT30    | 0.34                                                                          | 0.30                          | 11.42 | 9.43     | 37.93    | 6.03    | 7.38     | 16.81   |
| RGT40    | 0.63                                                                          | 0.17                          | 15.70 | 8.91     | 50.91    | 7.99    | 10.38    | 22.84   |
| RGT50    | 0.64                                                                          | 0.20                          | 19.04 | 7.66     | 80.04    | 10.47   | 7.59     | 58.52   |
| RGT60    | 0.68                                                                          | 0.63                          | 21.32 | 9.72     | 117.29   | 18.40   | 22.47    | 69.52   |
| RGT70    | 0.95                                                                          | 0.50                          | 24.27 | 9.57     | 141.43   | 35.21   | 18.64    | 73.14   |
| RGT80    | 1.02                                                                          | 0.78                          | 22.82 | 8.25     | 209.46   | 13.29   | 27.57    | 114.96  |
| RGT90    | 1.23                                                                          | 0.94                          | 27.32 | 12.96    | 289.61   | 32.46   | 45.54    | 191.25  |

**Table S5.** Free energies of the elementary steps involved in CO formation through photooxidation of CH<sub>3</sub>OH by •OH radicals on TiO<sub>2</sub>(101) surfaces and O-vacancy/TiO<sub>2</sub>(101) surfaces.

| Elementary steps                                            | $\Delta G$ (eV)        |                                  |
|-------------------------------------------------------------|------------------------|----------------------------------|
|                                                             | TiO <sub>2</sub> (101) | O-vacancy/TiO <sub>2</sub> (101) |
| CH <sub>3</sub> OH*+•OH→CH <sub>3</sub> O*+H <sub>2</sub> O | 0.18                   | 0.26                             |
| CH <sub>3</sub> O*+•OH →CH <sub>2</sub> O*+H <sub>2</sub> O | -1.72                  | 0.81                             |
| CH <sub>2</sub> O*+•OH →CHO*+H <sub>2</sub> O               | -0.22                  | 0.14                             |
| CHO*+•OH →CO*+H <sub>2</sub> O                              | 0.52                   | 0.12                             |



**Table S6.** Free energies of the elementary steps involved in CH<sub>3</sub>CH<sub>2</sub>OH and CH<sub>3</sub>CHO generation from CO reduction on the O-vacancy/TiO<sub>2</sub>(101) surface.

| Elementary steps                                                                                            | ΔG (eV) |
|-------------------------------------------------------------------------------------------------------------|---------|
| 2CO* → COCO* + * (non-electrochemical)                                                                      | 0.34    |
| COCO* + H <sup>+</sup> + e <sup>-</sup> → COCOH*                                                            | -0.09   |
| COCO* + H <sup>+</sup> + e <sup>-</sup> → HCOCO*                                                            | -0.84   |
| COCOH* + H <sup>+</sup> + e <sup>-</sup> → COCHOH*                                                          | -0.56   |
| HCOCO* + H <sup>+</sup> + e <sup>-</sup> → COCHOH*                                                          | 0.19    |
| COCHOH* + H <sup>+</sup> + e <sup>-</sup> → COCH <sub>2</sub> OH*                                           | -0.27   |
| COCH <sub>2</sub> OH* + H <sup>+</sup> + e <sup>-</sup> → CHOCH <sub>2</sub> OH*                            | -0.43   |
| COCH <sub>2</sub> OH* + H <sup>+</sup> + e <sup>-</sup> → COHCH <sub>2</sub> OH*                            | 0.63    |
| CHOCH <sub>2</sub> OH* + H <sup>+</sup> + e <sup>-</sup> → CHOHCH <sub>2</sub> OH*                          | 0.75    |
| COHCH <sub>2</sub> OH* + H <sup>+</sup> + e <sup>-</sup> → CHOHCH <sub>2</sub> OH*                          | -0.32   |
| CHOHCH <sub>2</sub> OH* + H <sup>+</sup> + e <sup>-</sup> → CHCH <sub>2</sub> OH* + H <sub>2</sub> O(g)     | 0.41    |
| CHCH <sub>2</sub> OH* + H <sup>+</sup> + e <sup>-</sup> → CH <sub>2</sub> CH <sub>2</sub> OH*               | -1.14   |
| CH <sub>2</sub> CH <sub>2</sub> OH* + H <sup>+</sup> + e <sup>-</sup> → CH <sub>3</sub> CH <sub>2</sub> OH* | -0.93   |
| CH <sub>3</sub> CH <sub>2</sub> OH* → CH <sub>3</sub> CH <sub>2</sub> OH(g) + * (non-electrochemical)       | 1.34    |
| CH <sub>3</sub> CH <sub>2</sub> OH* → H <sup>+</sup> + e <sup>-</sup> + CH <sub>3</sub> CHOH*               | 1.28    |
| CH <sub>3</sub> CHOH* → H <sup>+</sup> + e <sup>-</sup> + CH <sub>3</sub> CHO*                              | -1.05   |
| CH <sub>3</sub> CHO* → CH <sub>3</sub> CHO(g) + * (non-electrochemical)                                     | 1.22    |

**Table S7.** Free energies of the elementary steps involved in CH<sub>3</sub>COCH<sub>3</sub> generation from CO reduction on the O-vacancy/TiO<sub>2</sub>(101) surface.

| Elementary steps                                                                                            | $\Delta G$ (eV) | (0V) |
|-------------------------------------------------------------------------------------------------------------|-----------------|------|
| $2\text{CO}^* \rightarrow \text{COCO}^* + *$ (non-electrochemical)                                          | 0.34            |      |
| $\text{COCO}^* + \text{H}^+ + \text{e}^- \rightarrow \text{COCO}^*\text{H}^*$                               | -0.09           |      |
| $\text{COCO}^*\text{H}^* + \text{H}^+ + \text{e}^- \rightarrow \text{COC}^* + \text{H}_2\text{O}(\text{g})$ | -0.48           |      |
| $\text{COC}^* + \text{H}^+ + \text{e}^- \rightarrow \text{COCH}^*$                                          | -0.67           |      |
| $\text{COCH}^* + \text{H}^+ + \text{e}^- \rightarrow \text{COCH}_2^*$                                       | -0.79           |      |
| $\text{COCH}_2^* + \text{H}^+ + \text{e}^- \rightarrow \text{COCH}_3^*$                                     | -0.89           |      |
| $\text{COCH}_3^* + \text{CO}^* \rightarrow \text{COCOCH}_3^* + *$ (non-electrochemical)                     | -0.38           |      |
| $\text{COCOCH}_3^* + \text{H}^+ + \text{e}^- \rightarrow \text{COHCOCH}_3^*$                                | 0.30            |      |
| $\text{COHCOCH}_3^* + \text{H}^+ + \text{e}^- \rightarrow \text{CCOCH}_3^* + \text{H}_2\text{O}(\text{aq})$ | 1.02            |      |
| $\text{CCOCH}_3^* + \text{H}^+ + \text{e}^- \rightarrow \text{CHCOCH}_3^*$                                  | -1.32           |      |
| $\text{CHCOCH}_3^* + \text{H}^+ + \text{e}^- \rightarrow \text{CH}_2\text{COCH}_3^*$                        | -1.08           |      |
| $\text{CH}_2\text{COCH}_3^* + \text{H}^+ + \text{e}^- \rightarrow \text{CH}_3\text{COCH}_3^*$               | -0.13           |      |
| $\text{CH}_3\text{COCH}_3^* \rightarrow \text{CH}_3\text{COCH}_3(\text{g}) + *$ (non-electrochemical)       | 1.30            |      |

**Table S8.** Free energies of the elementary steps involved in CH<sub>3</sub>OH generation from CO reduction on the O-vacancy/TiO<sub>2</sub>(101) surface.

| Elementary steps                                                                      | $\Delta G$ (eV) |
|---------------------------------------------------------------------------------------|-----------------|
| $\text{CO}^* + \text{H}^+ + \text{e}^- \rightarrow \text{CHO}^*$                      | -0.12           |
| $\text{CO}^* + \text{H}^+ + \text{e}^- \rightarrow \text{COH}^*$                      | 1.34            |
| $\text{CHO}^* + \text{H}^+ + \text{e}^- \rightarrow \text{CH}_2\text{O}^*$            | -0.44           |
| $\text{CH}_2\text{O}^* + \text{H}^+ + \text{e}^- \rightarrow \text{CH}_3\text{O}^*$   | -0.81           |
| $\text{CH}_3\text{O}^* + \text{H}^+ + \text{e}^- \rightarrow \text{CH}_3\text{OH}^*$  | 0.50            |
| $\text{CH}_2\text{O}^* + \text{H}^+ + \text{e}^- \rightarrow \text{CH}_2\text{OH}^*$  | 0.44            |
| $\text{CH}_2\text{OH}^* + \text{H}^+ + \text{e}^- \rightarrow \text{CH}_3\text{OH}^*$ | -0.75           |
| $\text{CHO}^* + \text{H}^+ + \text{e}^- \rightarrow \text{CHOH}^*$                    | 0.80            |
| $\text{COH}^* + \text{H}^+ + \text{e}^- \rightarrow \text{CHOH}^*$                    | -0.66           |
| $\text{CHOH}^* + \text{H}^+ + \text{e}^- \rightarrow \text{CH}_2\text{OH}^*$          | -0.80           |
